# Supplementary material for: Dynamic photo-control of kinesin on a photoisomerizable monolayer – hydrolysis rate of ATP and motility of microtubules depending on the terminal group
Source: Royal Society of Chemistry journal article supplement (doi:10.1039/c2ob07167c), 2012-01-01
Supplement: c2ob07167c.pdf [file c2ob07167c.pdf]

## Supporting Information

| Compounds | Contact angle       |                    |
|-----------|---------------------|--------------------|
|           | Before deprotection | After deprotection |
| <b>1a</b> | <b>73°</b>          | <b>65°</b>         |
| <b>1b</b> | <b>74°</b>          | <b>66°</b>         |
| <b>1c</b> | <b>72°</b>          | <b>56°</b>         |
| <b>1d</b> | <b>73°</b>          | <b>52°</b>         |
| <b>1e</b> | <b>74°</b>          | <b>66°</b>         |

**Table S1.** The wettability of monolayers 1a-e, before deprotection and after 4 h treatment of TFA.

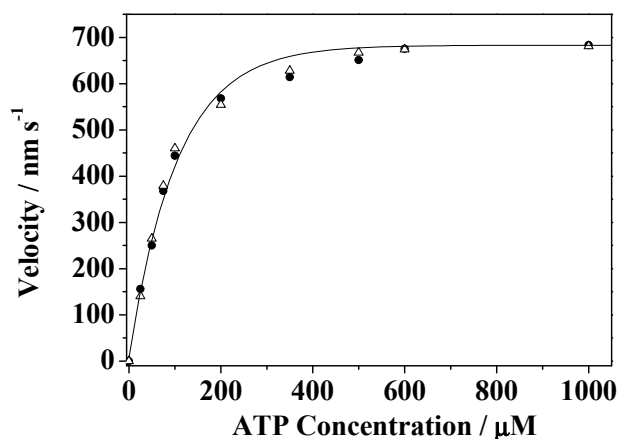

**Figure S2:** Represents the effect of with (black circle) and without (triangle) UV light irradiation on motility of MTs in the presence of ATP by control experiment.

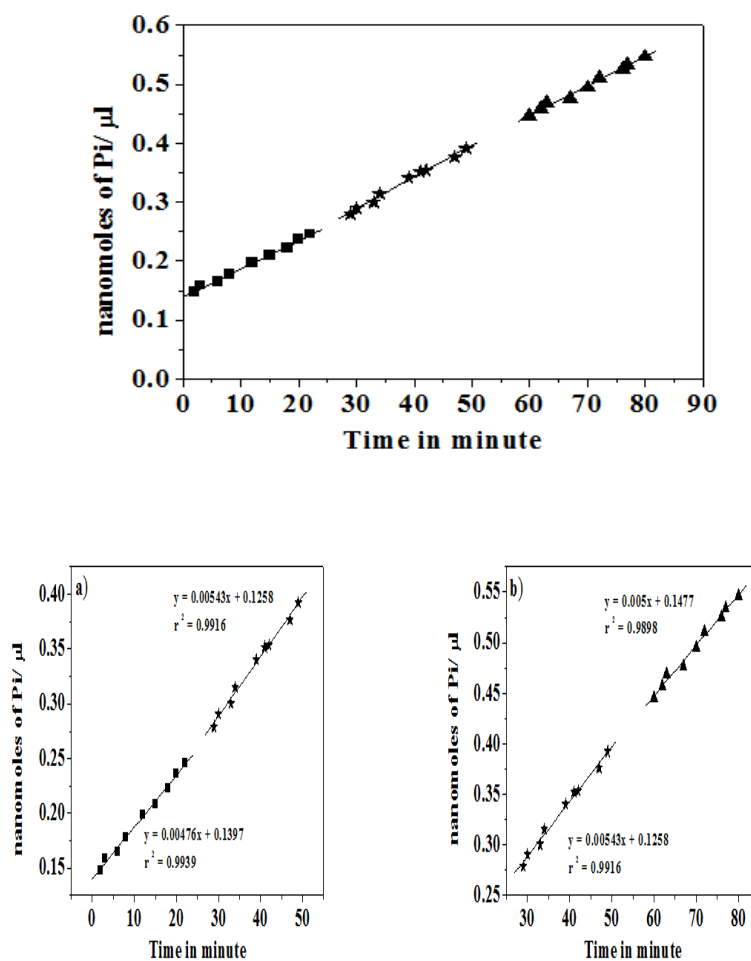

**Figure S3:** Time dependent inorganic phosphate releases from hydrolysis of ATP by kinesin at different environments of azobenzene functionalized surface of **1b** (top); before irradiation (squares), after 366 nm irradiation (stars) and after visible light irradiation (triangles). Bottom: Enlarged figure of phosphate release (a) before and after 366 nm irradiation and (b) after 366 nm and >500 nm irradiation.

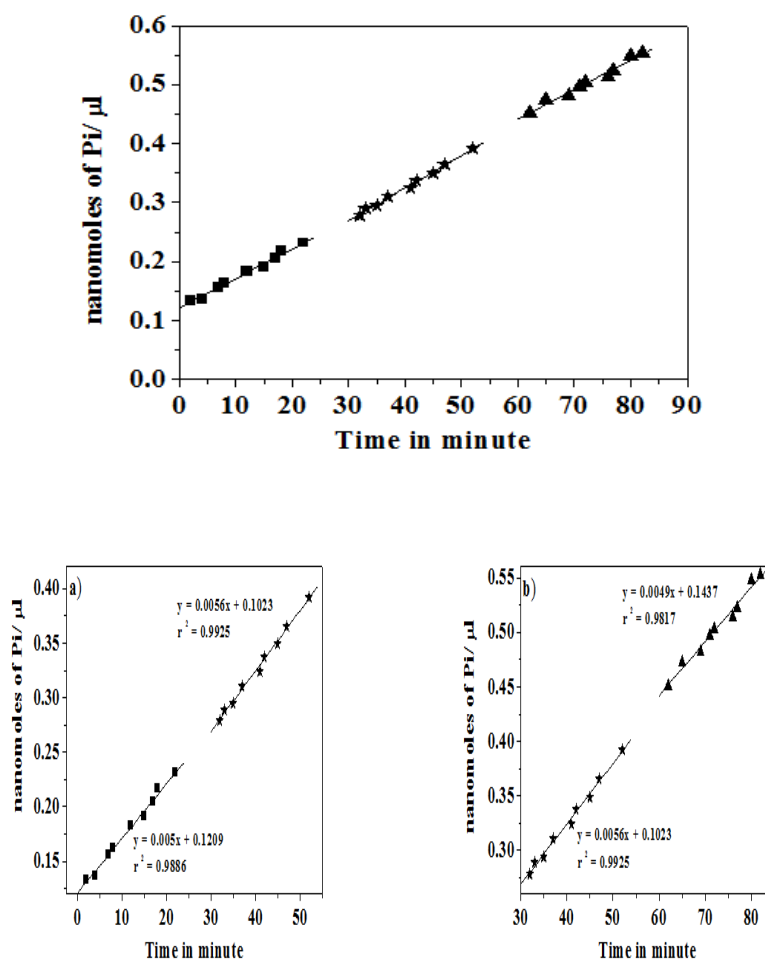

**Figure S4:** Time dependent inorganic phosphate releases from hydrolysis of ATP by kinesin at different environments of azobenzene functionalized surface of **1c** (top); before irradiation (squares), after 366 nm irradiation (stars) and after visible light irradiation (triangles). Bottom: Enlarged figure of phosphate release (a) before and after 366 nm irradiation and (b) after 366 nm and >500 nm irradiation.

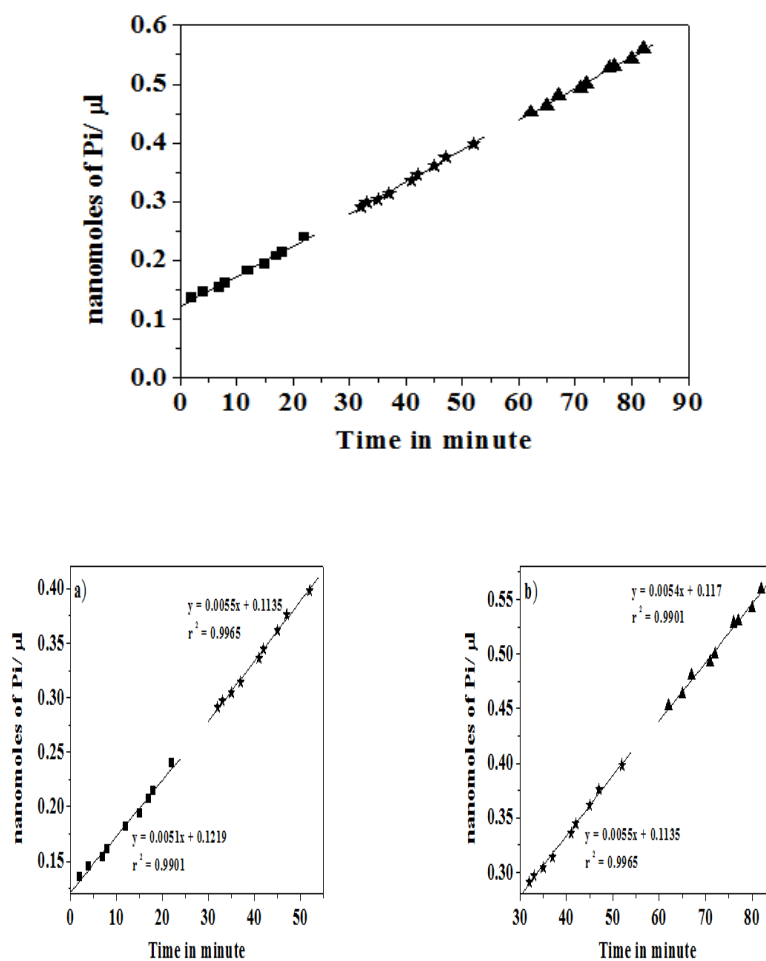

**Figure S5:** Time dependent inorganic phosphate releases from hydrolysis of ATP by kinesin at different environments of azobenzene functionalized surface of **1d** (top); before irradiation (squares), after 366 nm irradiation (stars) and after visible light irradiation (triangles). Bottom: Enlarged figure of phosphate release (a) before and after 366 nm irradiation and (b) after 366 nm and >500 nm irradiation.

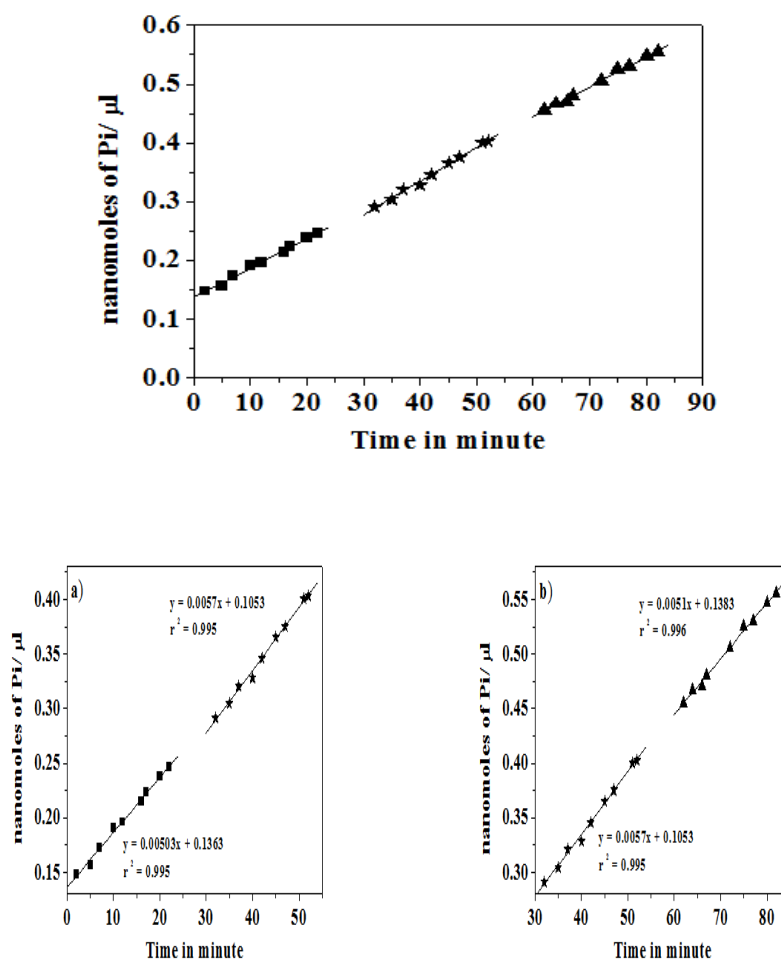

**Figure S6:** Time dependent inorganic phosphate releases from hydrolysis of ATP by kinesin at different environments of azobenzene functionalized surface of **1e** (top); before irradiation (squares), after 366 nm irradiation (stars) and after visible light irradiation (triangles). Bottom: Enlarged figure of phosphate release (a) before and after 366 nm irradiation and (b) after 366 nm and 440 nm irradiation.
